# Supplementary material
Source: HighWire-hosted journal article supplement (https://ijgc.bmj.com/highwire/filestream/28586/field_highwire_adjunct_files/0/ijgc-2022-004149supp001_data_supplement.pdf)
Supplement: ijgc-2022-004149supp001_data_supplement.pdf [file ijgc-2022-004149supp001_data_supplement.pdf]

**Table S1.** Comparing the relapse timing between placebo (a) and PARPi (b) arms from SOLO1, PRIMA, and ATHENA-MONO trials.

|                                                                    | SOLO1   |      | PRIMA   |       | ATHENA-MONO |         |      |
|--------------------------------------------------------------------|---------|------|---------|-------|-------------|---------|------|
|                                                                    | Placebo |      | Placebo |       | Placebo     |         |      |
|                                                                    | BRCAm   | HRd  | Overall | BRCAm | HRd         | Overall | HRp  |
| <b>Platinum-resistant recurrent ovarian cancer (&lt; 6 months)</b> | ~20%    | ~30% | ~40%    | ~15%  | ~25%        | ~30%    | ~40% |
| <b>Platinum-eligible recurrent ovarian cancer (&gt; 6 months)</b>  | ~55%    | ~40% | ~35%    | ~55%  | ~45%        | ~45%    | ~40% |
| <b>Long-term responders (&gt; 2 years)</b>                         | ~25%    | ~30% | ~25%    | ~30%  | ~30%        | ~25%    | ~20% |

|                                                                    | SOLO1    |      | PRIMA     |       | ATHENA-MONO |         |      |
|--------------------------------------------------------------------|----------|------|-----------|-------|-------------|---------|------|
|                                                                    | Olaparib |      | Niraparib |       | Rucaparib   |         |      |
|                                                                    | BRCAm    | HRd  | Overall   | BRCAm | HRd         | Overall | HRp  |
| <b>Platinum-resistant recurrent ovarian cancer (&lt; 6 months)</b> | ~5%      | ~15% | ~25%      | < 5%  | ~5%         | ~15%    | ~20% |
| <b>Platinum-eligible recurrent ovarian cancer (&gt; 6 months)</b>  | ~45%     | ~35% | ~40%      | ~35%  | ~45%        | ~55%    | ~55% |
| <b>Long-term responders (&gt; 2 years)</b>                         | ~50%     | ~50% | ~35%      | ~60%  | ~50%        | ~30%    | ~25% |

Abbreviations: BRCAm, BRCA gene-mutated; HRd, homologous recombination-deficient; HRp, homologous recombination-proficient.

**Table S2.** Ongoing, registered phase III RCTs for PRROC (as of November 2022).

| Trial                                                                                                                                                                                                                                                                                       | NCT identifier                       | Design                                 | Setting                                                                         | Treatment arms                                                                                                                                                                                                                                                                          | Primary endpoints | Estimated enrollment | ECD           | Sponsor / Collaborator                           |
|---------------------------------------------------------------------------------------------------------------------------------------------------------------------------------------------------------------------------------------------------------------------------------------------|--------------------------------------|----------------------------------------|---------------------------------------------------------------------------------|-----------------------------------------------------------------------------------------------------------------------------------------------------------------------------------------------------------------------------------------------------------------------------------------|-------------------|----------------------|---------------|--------------------------------------------------|
| A Phase 3 Study of Relacorilant in Combination With Nab-Paclitaxel Versus Nab-Paclitaxel Monotherapy in Advanced, Platinum-Resistant, High-Grade Epithelial Ovarian, Primary Peritoneal, or Fallopian-Tube Cancer                                                                           | NCT05257408<br>GOG-3073<br>(ROSELLA) | Open-label, multicenter, phase III RCT | PRROC, ≤ 3 CHT lines. One prior treatment with bevacizumab is required.         | <b>Experimental:</b> Nab-paclitaxel 80 mg/mq d1,8,15 Q4W + Relacorilant (SGRM) 150 mg PO OD (on the day before, the day of, and the day after nab-paclitaxel). Relacorilant will not be administered on cycle 1 day -1.<br><br><b>Comparator:</b> Nab-paclitaxel 100 mg/mq d1,8,15 Q4W. | PFS               | 360                  | June 2025     | Corcept Therapeutics / GOG                       |
| A Multicenter, Randomized, Open, Parallel Controlled Phase III Clinical Trial to Evaluate the Efficacy and Safety of TQB2450 Injection Combined With Anlotinib Hydrochloride Capsules Versus Paclitaxel as Weekly Treatment in the Treatment of Recurrent Platinum-resistant Ovarian Cancer | NCT05145218                          | Open-label, multicenter, phase III RCT | PRROC, ≤ 4 CHT lines (no more than 1 CHT is accepted after platinum resistance) | <b>Experimental:</b> TQB2450 (anti-PD-1 mAb) 1200 mg IV Q3W (maximum 24 months) + Anlotinib Hydrochloride (TKI) 12 mg PO OD for 2 weeks Q3W<br><br><b>Comparator:</b> PTX 80 mg/mq IV QW                                                                                                | PFS<br>OS         | 405                  | December 2024 | Chia Tai Tianqing Pharmaceutical Group Co., Ltd. |
| A Randomized, Open-label, Phase 3 Study of Mirvetuximab Soravtansine vs. Investigator's Choice of Chemotherapy in Platinum-Resistant, Advanced High-Grade Epithelial Ovarian, Primary Peritoneal, or Fallopian Tube Cancers With High Folate Receptor-Alpha Expression                      | NCT04209855<br>(MIRASOL/ENGOT-ov55)  | Open-label, multicenter, phase III RCT | PRROC with IHC confirmation of FRα positivity, ≤ 3 CHT lines                    | <b>Experimental:</b> MIRV (anti-FRa mAb) 6 mg/kg IV Q3W.<br><br><b>Comparator (IC):</b> PTX 80 mg/mq IV d1,8,15 Q4W; PLD 40 mg/mq IV Q4W; Topo either 4                                                                                                                                 | PFS               | 430                  | April 2024    | ImmunoGen, Inc.<br>GOG<br>ENGOT                  |

|                                                                                                                                                                                                       |                                                  |                                          |                                    |                                                                                                                                                                                                                                                                                                                                                                                                                     |           |     |                  |                              |
|-------------------------------------------------------------------------------------------------------------------------------------------------------------------------------------------------------|--------------------------------------------------|------------------------------------------|------------------------------------|---------------------------------------------------------------------------------------------------------------------------------------------------------------------------------------------------------------------------------------------------------------------------------------------------------------------------------------------------------------------------------------------------------------------|-----------|-----|------------------|------------------------------|
|                                                                                                                                                                                                       |                                                  |                                          |                                    | mg/mq QW or 1.25 mg/mq d1-5 Q3W                                                                                                                                                                                                                                                                                                                                                                                     |           |     |                  |                              |
| A Multi-center, Double-blind, Randomized Phase III Clinical Trial of Chiauranib Plus Weekly Paclitaxel in Patients With Platinum-refractory or Platinum-resistant Recurrent Ovarian Cancer            | NCT04921527 (CHIPRO)                             | Double-blind, multicenter, phase III RCT | PRROC, $\leq 2$ CHT lines          | <b>Experimental:</b> Chiauranib (TKI) 50 mg PO OD + PTX 60-80 mg/mq IV d1,8,15 Q3W, for 6 cycles.<br><br><b>Comparator:</b> Placebo + PTX 60-80 mg/mq IV d1,8,15 Q3W, for 6 cycles.                                                                                                                                                                                                                                 | PFS<br>OS | 376 | July 31, 2025    | Chipscreen Biosciences, Ltd. |
| A Phase 3, Randomized, Double-Blind Study of Pembrolizumab Versus Placebo in Combination With Paclitaxel With or Without Bevacizumab for the Treatment of Platinum-resistant Recurrent Ovarian Cancer | NCT05116189 (MK-3475-B96/KEYNOTE-B96/ENGOT-ov65) | Double-blind, multicenter, phase III RCT | PRROC, $\leq 2$ CHT lines          | <b>Experimental:</b> Pembrolizumab 400 mg IV Q6W for 18 cycles (~2 years) + PTX 80 mg/mq IV d1,8,15 Q3W, until PD or intolerance $\pm$ Bevacizumab 10 mg/kg IV Q2W until PD, intolerance or at the investigator's discretion.<br><br><b>Comparator:</b> Placebo + PTX 80 mg/mq IV d1,8,15 Q3W, until PD or intolerance $\pm$ Bevacizumab 10 mg/kg IV Q2W until PD, intolerance or at the Investigator's discretion. | PFS       | 616 | August 31, 2027  | Merck Sharp & Dohme LLC      |
| A Phase III, Multi-center, Randomized (1:1), Open-label, Active-controlled, Study to Assess the Efficacy and Safety of Alpelisib (BYL719) in                                                          | NCT04729387 (EPIK-O/ENGOT-ov61)                  | Open-label, multicenter, phase III RCT   | PRROC, gBRCAwt, $\leq 3$ CHT lines | <b>Experimental:</b> Alpelisib 200 mg PO OD + Olaparib 200 mg PO BID.                                                                                                                                                                                                                                                                                                                                               | PFS       | 358 | January 31, 2025 | Novartis Pharmaceuticals     |

|                                                                                                                                                                                                                                                           |                                      |                                          |                                                                         |                                                                                                                                                                                                                                                                                                                                               |     |     |               |                                          |
|-----------------------------------------------------------------------------------------------------------------------------------------------------------------------------------------------------------------------------------------------------------|--------------------------------------|------------------------------------------|-------------------------------------------------------------------------|-----------------------------------------------------------------------------------------------------------------------------------------------------------------------------------------------------------------------------------------------------------------------------------------------------------------------------------------------|-----|-----|---------------|------------------------------------------|
| Combination With Olaparib as Compared to Single Agent Cytotoxic Chemotherapy, in Participants With no Germline BRCA Mutation Detected, Platinum-resistant or Refractory, High-grade Serous Ovarian Cancer                                                 |                                      |                                          |                                                                         | <b>Comparator (IC):</b> PTX 80 mg/mq IV QW or PLD 40-50 mg/mq IV Q4W.                                                                                                                                                                                                                                                                         |     |     |               |                                          |
| A Phase 3, Randomized, Double-Blind, Placebo/Paclitaxel-Controlled Study of Batiraxcept (AVB-S6-500) in Combination With Paclitaxel in Patients With Platinum-Resistant Recurrent Ovarian Cancer                                                          | NCT04729608 (AXLerate-OC/ENGOT-ov66) | Double-blind, multicenter, phase III RCT | PRROC, ≤ 4 CHT lines                                                    | <b>Experimental:</b> Batiraxcept (soluble AXL-IgG1 Fc fusion protein, that inhibits GAS6) + PTX<br><br><b>Comparator:</b> Placebo + PTX                                                                                                                                                                                                       | PFS | 350 | July 2024     | Aravive GOG ENGOT                        |
| A Phase 3, Multicenter, Open-Label, Randomized Study of Nemvaleukin Alfa in Combination With Pembrolizumab Versus Investigator's Choice Chemotherapy in Patients With Platinum-Resistant Epithelial Ovarian, Fallopian Tube, or Primary Peritoneal Cancer | NCT05092360 (ARTISTRY-7)             | Open-label, multicenter, phase III RCT   | PRROC, ≤ 5 CHT lines. One prior treatment with bevacizumab is required. | <b>Experimental:</b> Nemvaleukin (IL-2R agonist) 6 µg/kg IV d1-5 Q3W + Pembrolizumab: 200 mg IV Q3W<br><b>Experimental:</b> Nemvaleukin<br><b>Experimental:</b> Pembrolizumab<br><br><b>Comparator (IC):</b> PLD 40 mg/mq IV Q4W, PTX 80 mg/mq IV QW, Topo 4 mg/mq IV d1,8,15 Q4W (or 1.25 mg/mq d1-5 Q3W) or Gemcitabine 1000 mg/mq d1,8 Q3W | PFS | 376 | December 2026 | Alkermes, Inc. Merck Sharp & Dohme LLC   |
| A Randomized, Double-blind, Phase III Study of BD0801 Injection Combined With Chemotherapy Versus Placebo Combined With Chemotherapy in Patients With Recurrent, Platinum-                                                                                | NCT04908787                          | Double-blind, multicenter, phase III RCT | PRROC, ≤ 2 CHT lines                                                    | <b>Experimental:</b> BD0801 (anti-VEGF mAb) 1.5 mg/kg IV d1,15 Q4W + PLD, PTX or Topo                                                                                                                                                                                                                                                         | PFS | 357 | December 2023 | Jiangsu Simcere Pharmaceutical Co., Ltd. |

|                                                                                                                                                                                                                                                           |                                      |                                        |                                                                                                           |                                                                                                                                                                                                                                                                                        |            |     |                                         |                                                                    |
|-----------------------------------------------------------------------------------------------------------------------------------------------------------------------------------------------------------------------------------------------------------|--------------------------------------|----------------------------------------|-----------------------------------------------------------------------------------------------------------|----------------------------------------------------------------------------------------------------------------------------------------------------------------------------------------------------------------------------------------------------------------------------------------|------------|-----|-----------------------------------------|--------------------------------------------------------------------|
| resistant Epithelial Ovarian, Fallopian Tube, or Primary Peritoneal Cancer                                                                                                                                                                                |                                      |                                        |                                                                                                           | <b>Comparator:</b> PLD 40 mg/mq IV Q4W, PTX 80 mg/mq IV QW, Topo 4 mg/mq IV d1,8,15 Q4W                                                                                                                                                                                                |            |     |                                         |                                                                    |
| A Randomized Phase 3 Study Assessing the Efficacy and Safety of Olvi-Vec Followed by Platinum-doublet Chemotherapy and Bevacizumab Compared With Platinum-doublet Chemotherapy and Bevacizumab in Women With Platinum-Resistant/Refractory Ovarian Cancer | NCT05281471<br>GOG-3076<br>(OnPrime) | Open-label, multicenter, phase III RCT | PRROC, minimum 3 prior CHT lines with no maximal limit. One prior treatment with bevacizumab is required. | <b>Experimental:</b> Olvi-Vec (oncolytic vaccinia virus) IP 2 consecutive days at week 0 + Platinum-doublet + bevacizumab starting from week 4<br><br><b>Comparator:</b> Platinum-doublet + bevacizumab starting from week 0                                                           | PFS        | 186 | October 2026                            | Genelux Corporation<br>GOG                                         |
| An Open Label Randomized Study of Navicixizumab Plus Paclitaxel and Navicixizumab Monotherapy in Comparison to Paclitaxel Monotherapy in Patients With Platinum-Resistant Epithelial Ovarian, Primary Peritoneal, or Fallopian Tube Cancer                | NCT05043402                          | Open-label, multicenter, phase III RCT | PRROC, $\geq 2$ and $\leq 5$ prior CHT lines. One prior treatment with bevacizumab is required.           | <b>Experimental:</b> Navicixizumab 3 mg/kg IV d1,15 Q4W + PTX 80 mg/mq IV d1,8,15 Q4W<br><br><b>Experimental:</b> Navicixizumab<br><br><b>Comparator:</b> PTX                                                                                                                          | ORR<br>PFS | 400 | August 15, 2024<br>(not yet recruiting) | OncXerna Therapeutics, Inc.                                        |
| Randomized Phase III Trial on Niraparib-TSR-042 (Dostarlimab) vs Physician's Choice CHEmotherapy in Recurrent, Ovarian, Fallopian Tube or Primary Peritoneal Cancer Patients Not Candidate for Platinum Retreatment: NITCHE Trial (MITO 33)               | NCT04679064<br>(NITCHE/MITO33)       | Open-label, multicenter, phase III RCT | PRROC, $\leq 2$ prior CHT lines.                                                                          | <b>Experimental:</b> Niraparib 200-300 mg OD + Dostarlimab 500 mg Q3W for the first 4 cycles and then 1000 mg Q6W<br><br><b>Comparator (IC):</b> PLD 40 mg/mq IV Q4W, PTX 80 mg/mq IV QW, Gemcitabine 1000 mg/mq d1,8,15 Q4W, or Topotecan 1.25 mg d1-5 Q3W. Bevacizumab can be added. | OS         | 427 | January 1, 2025                         | Fondazione Policlinico Universitario Agostino Gemelli IRCCS<br>GSK |

Abbreviations: AXL, gene encoding for the tyrosine-protein kinase receptor UFO; ENGOT, European Network of Gynaecological Oncological Trial Groups; FR, folate receptor; GAS6, growth arrest-specific 6; gBRCAwt, germline BRCA wild type; GOG, Gynecologic Oncology Group; IC, investigator's choice; IgG, immunoglobulin G; IHC, immunohistochemical; IL-2R, interleukin-2 receptor; IP, intraperitoneal; IV, intravenous; MIRV, mirvetuximab soravtansine; mAb, monoclonal antibody; Nab, Nanoparticle albumin-bound; OD, once daily; OS, overall survival; PD-1, programmed cell death protein 1; PFS, progression-free survival; PLD, pegylated liposomal doxorubicin; PO, per os; PRROC, platinum-resistant recurrent ovarian cancer; PTX, paclitaxel; Q2W, every 2 weeks; Q3W, every 3 weeks; Q4W, every 4 weeks; Q6W, every 6 weeks; QW, once a week; RCT, randomized clinical trial; SGRM, selective glucocorticoid receptor modulator, TKI, tyrosine kinase inhibitor; Topo, topotecan; VEGF, vascular endothelial growth factor.
